# Supplementary material
Source: Springer Nature journal article supplement (https://www.springermedizin.de/resource/supplementary/12871_2013_210_MOESM3_ESM.pdf/9429152)
Supplement: MOESM3 [file 9429152]

**Table E1.** Patient's demographics and clinical characteristics

| <b>Females</b> | <b>Age</b> | <b>ICU</b>             | <b>SAPS 2</b> | <b>Admission<br/>PaO<sub>2</sub>/FiO<sub>2</sub></b> | <b>Survivors</b> |
|----------------|------------|------------------------|---------------|------------------------------------------------------|------------------|
| 1/11           | 70 ±13     | 8 Cardiac<br>3 General | 46 ±11        | 214 ±54                                              | 9/11             |
